# Supplementary material for: Advanced MRI features of intraventricular inflammatory myofibroblastic tumor: a case report
Source: Springer Nature journal article supplement (doi:10.1186/s12883-022-02993-8), 2022-12-02

Figure S1

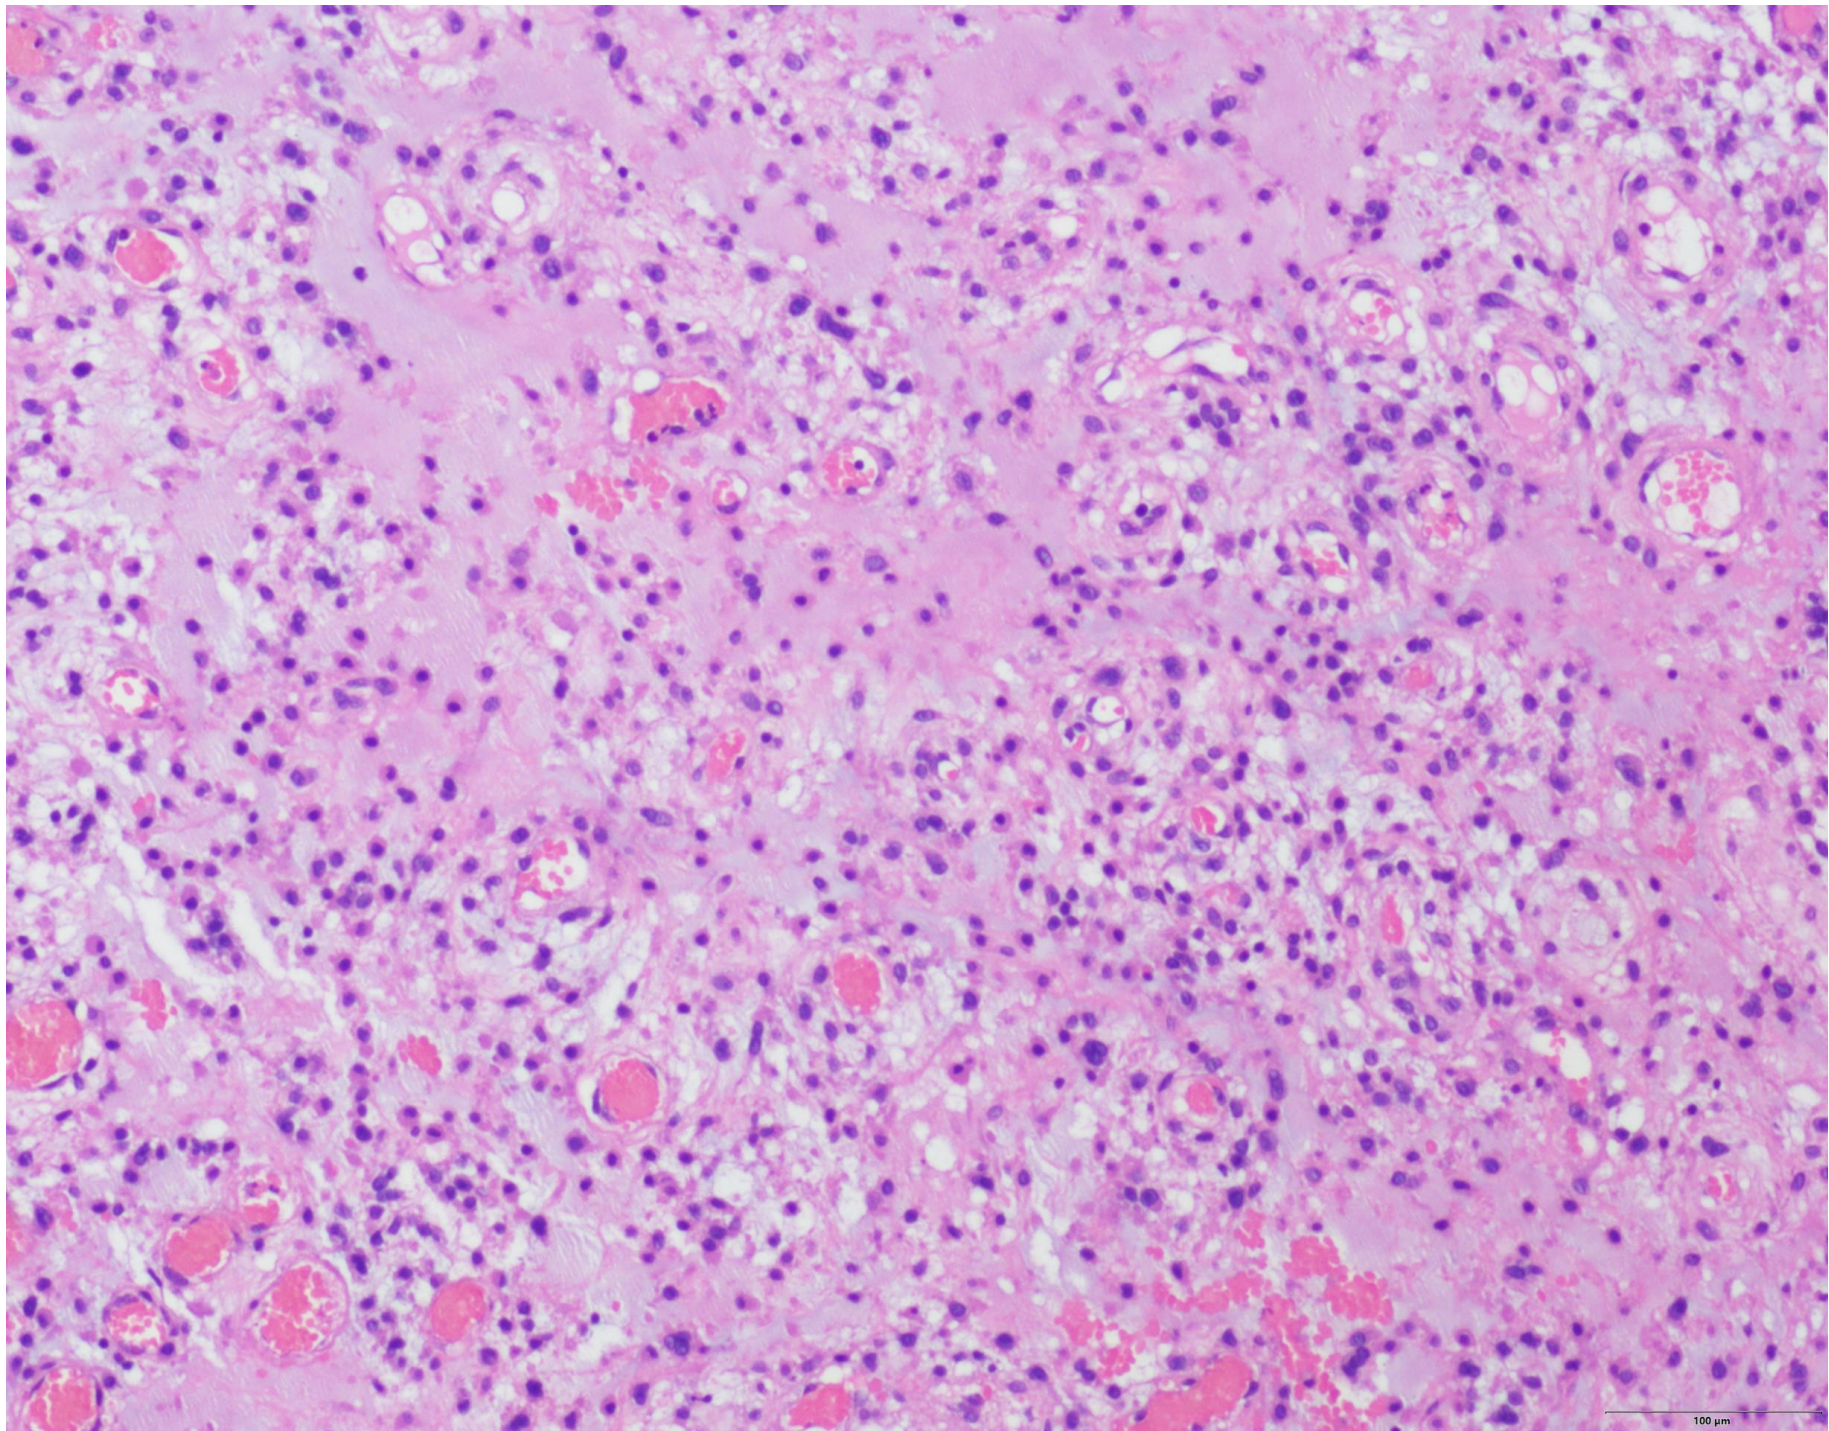

Figure S2

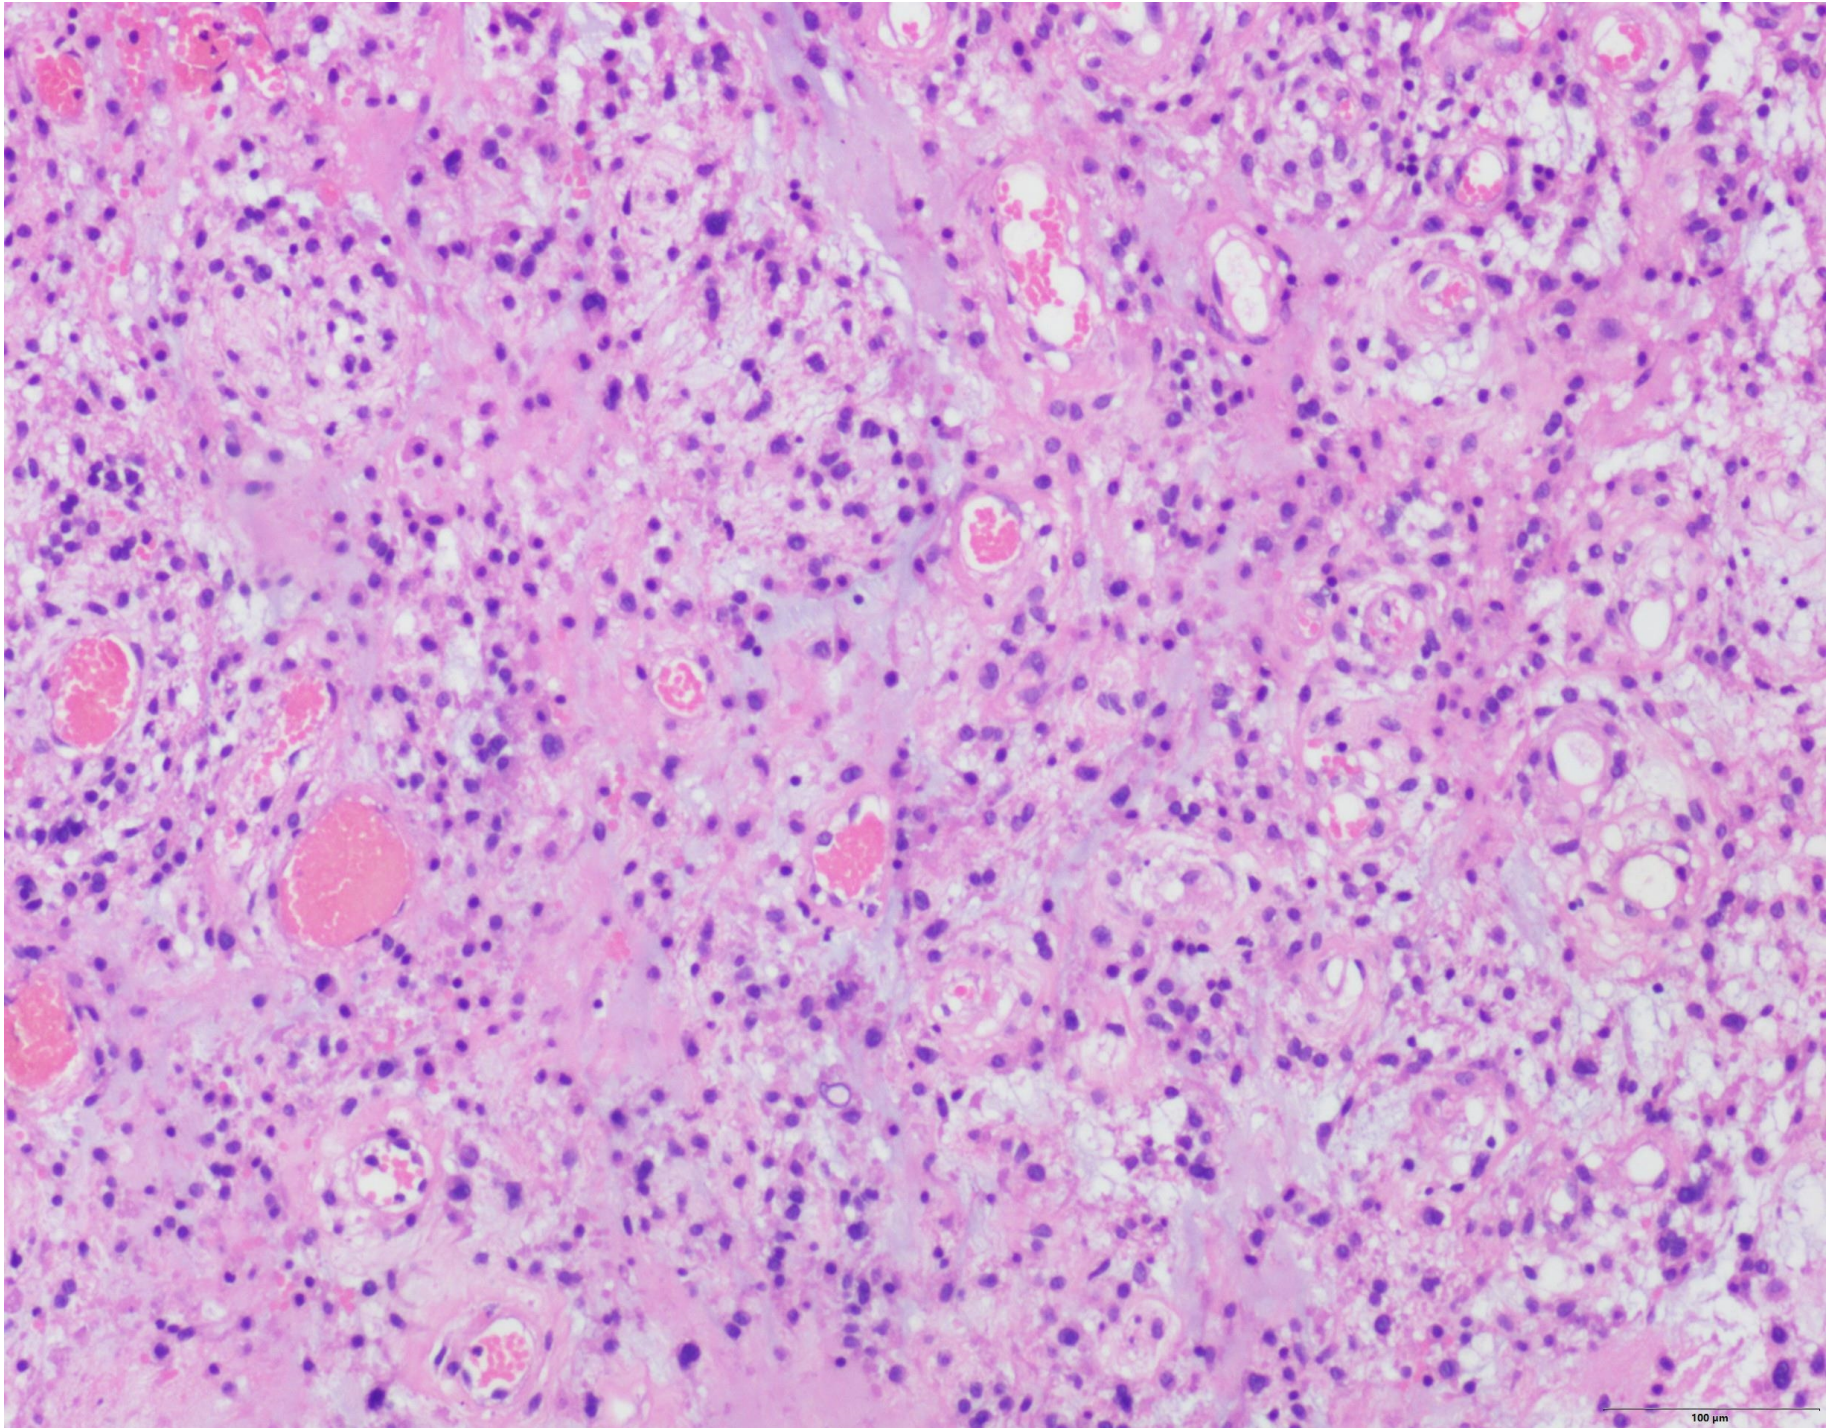

Figure S3

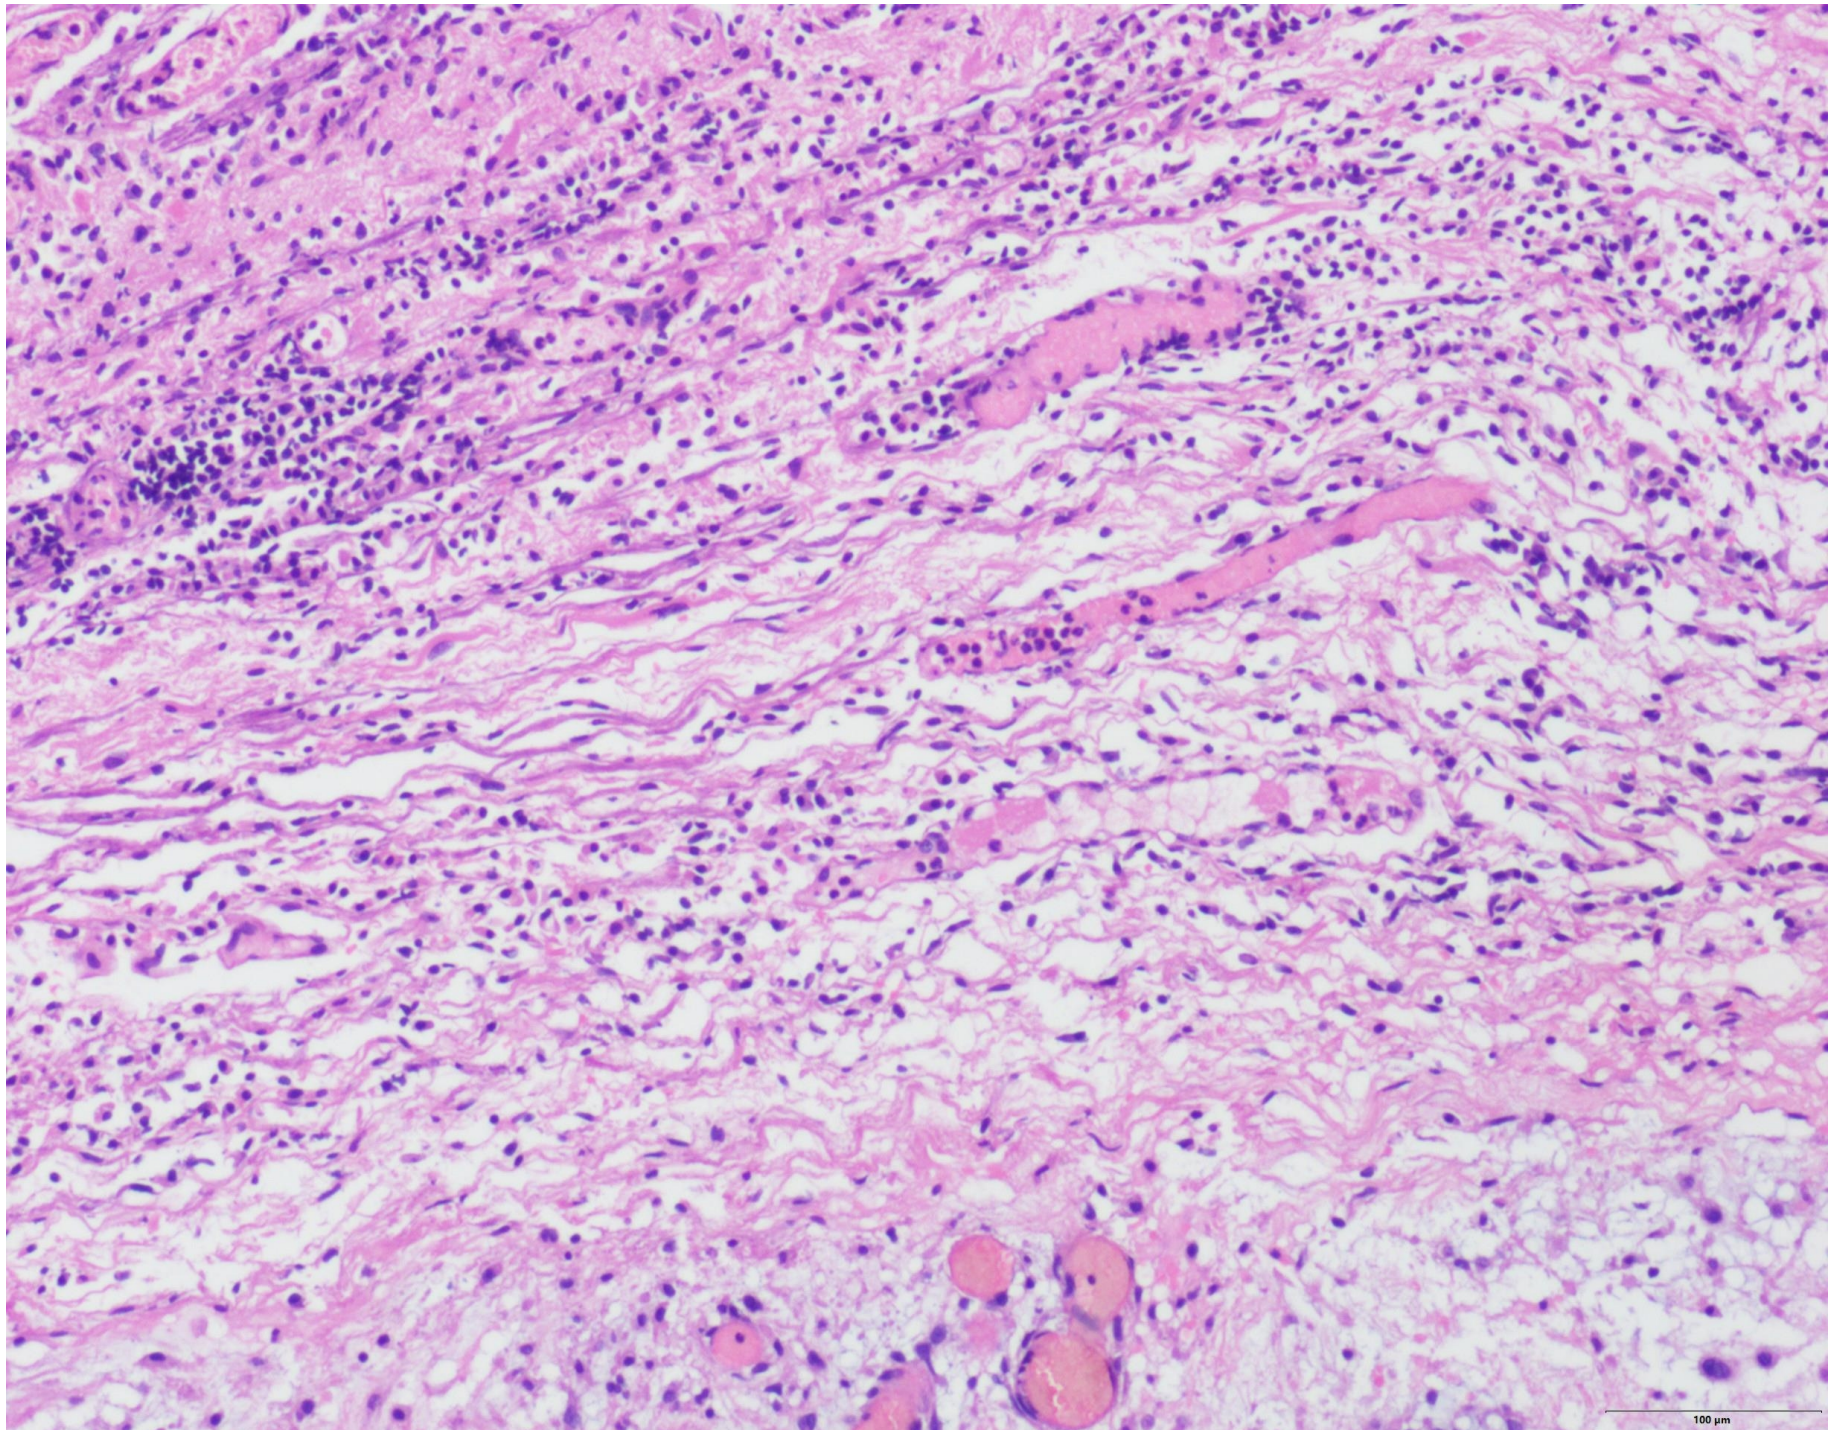

Figure S4

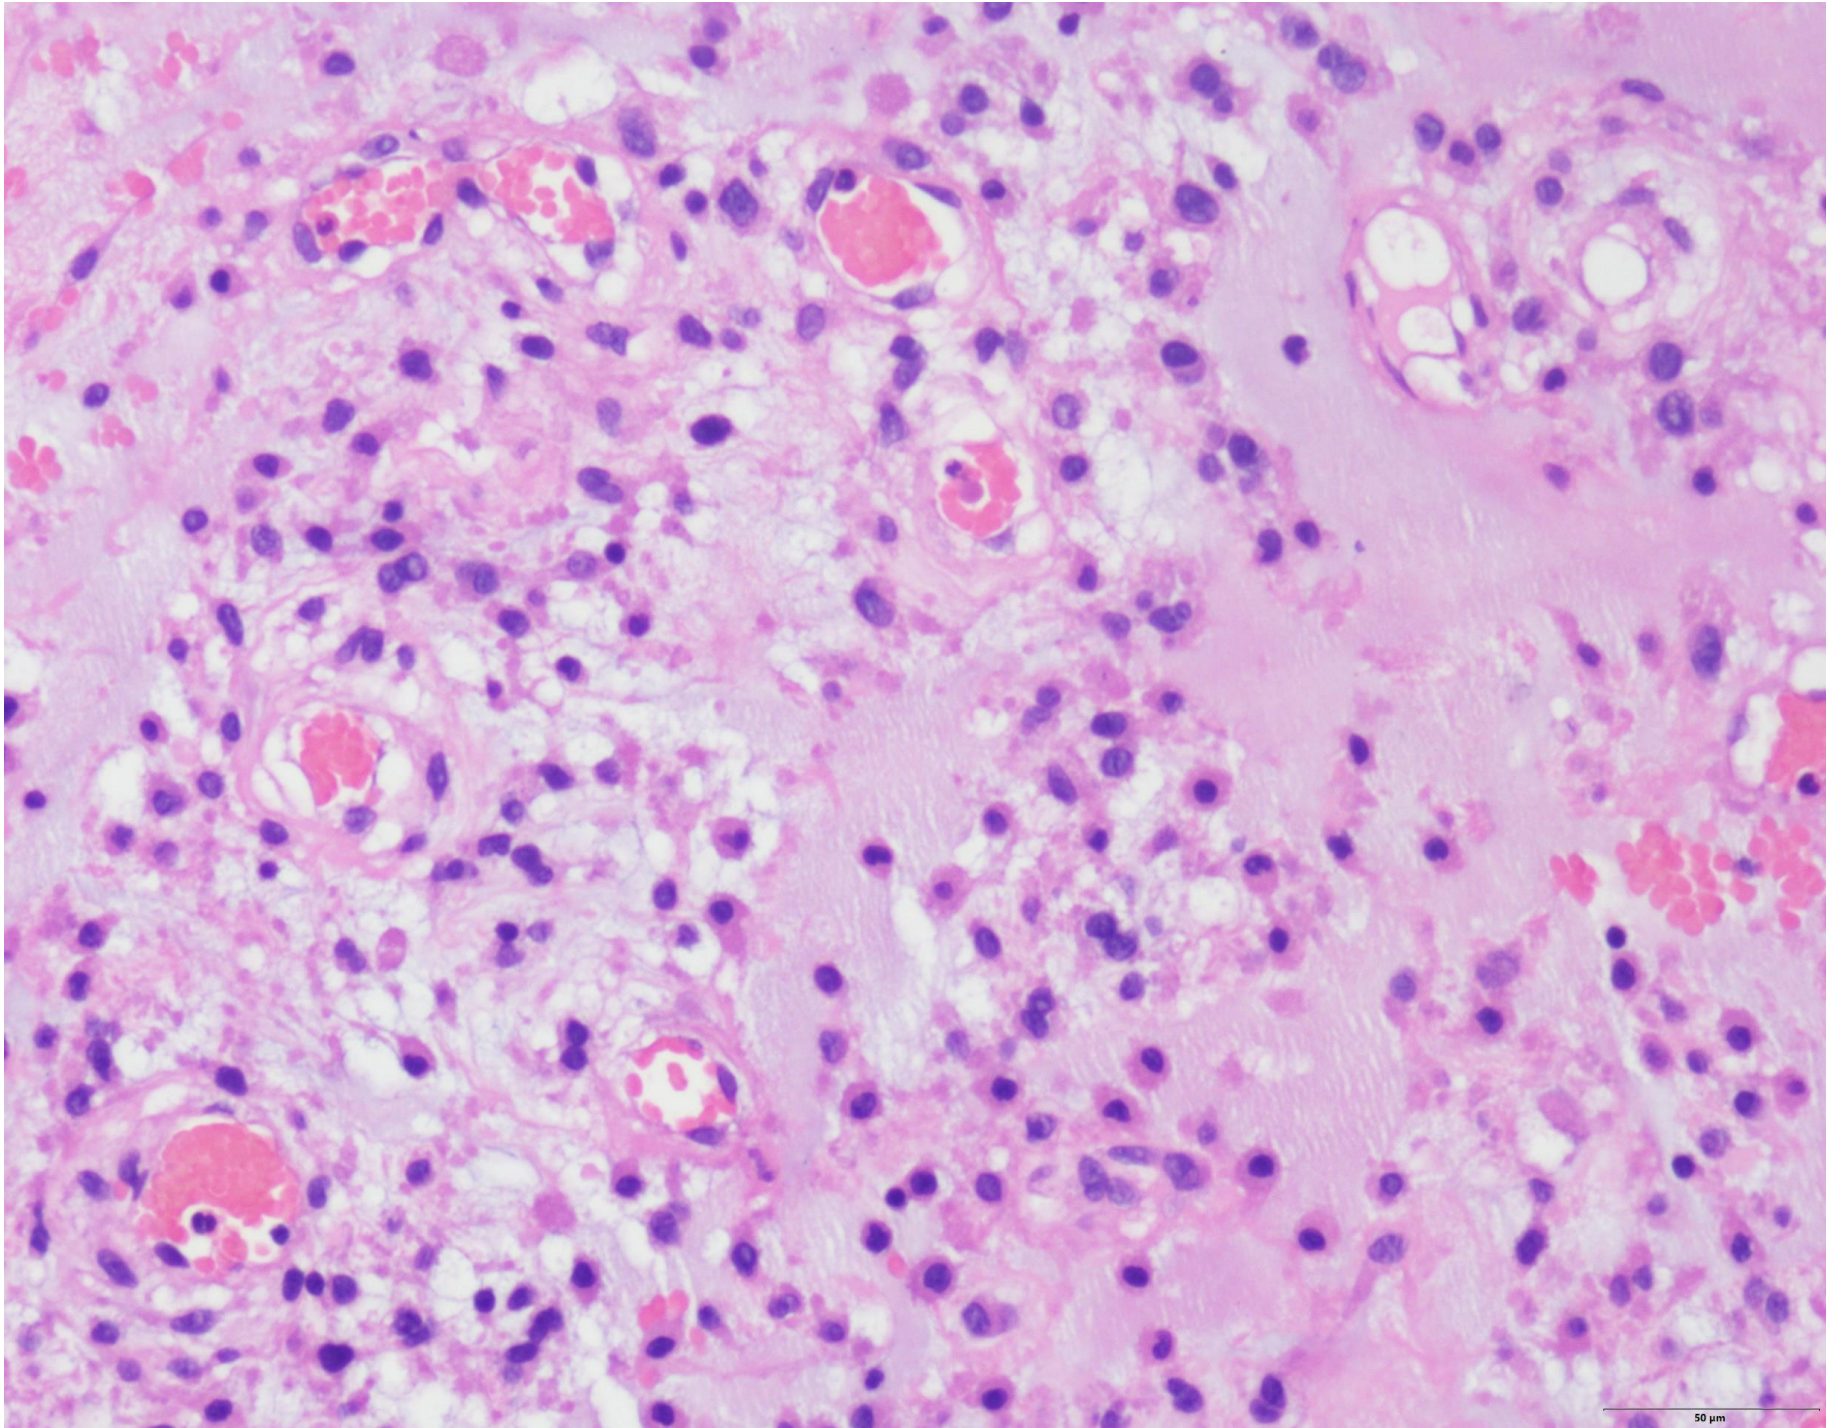

Supplement: MOESM1 [file 23783362]
